# Supplementary material
Source: PubMed Central journal article supplement (PMC5210063)
Supplement: PulmCirc-006-539.s001.pdf [file PulmCirc-006-539.s001.pdf]

**Appendix from Elangovan et al., “Endotoxin- and mechanical stress–  
induced epigenetic changes in the regulation of the nicotinamide  
phosphoribosyltransferase promoter”  
(Pulm. Circ., vol. 6, no. 4, p. 539)**

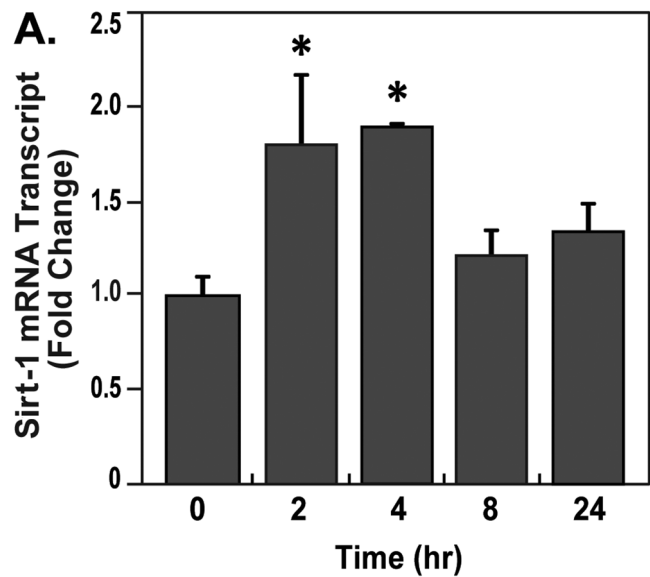

Figure S1. Sirt-1 expression is increased by toll-like receptor 4 (TLR4) activation. Quantitative PCR (qPCR) assays demonstrated increased expression of Sirt-1 messenger RNA transcripts in lipopolysaccharide (LPS)-mediated TLR4 activation in human lung endothelial cells. RNA from cells activated with LPS was reverse transcribed and probed with primers specific for Sirt-1. The results showed that Sirt-1 was increased as early as 2 hours and stayed elevated at 4 hours. The data are for  $n = 3$ . Asterisk indicates  $P < 0.05$  compared with 0 hours. mRNA: messenger RNA.
